# Supplementary material for: The Use of Three-Dimensional Images and Food Descriptions from a Smartphone Device Is Feasible and Accurate for Dietary Assessment
Source: MDPI journal article supplement (doi:10.3390/nu16060828), 2024-03-14
Supplement: s1 [file s1]

## Supplementary Materials

**Table S1.** Descriptions of Study foods.

|                   | Amount of food provided to participant |              | Energy density of food |
|-------------------|----------------------------------------|--------------|------------------------|
|                   | Mean                                   | (min - max)  | Energy/100 g           |
| <b>Meal 1</b>     |                                        |              |                        |
| Lasagna           | 849.0 g                                | (684 – 1025) | 202 kcal               |
| Broccoli          | 201.0 g                                | (140 – 273)  | 87 kcal                |
| Garlic Bread      | 183.1 g                                | (138 – 258)  | 337 kcal               |
| <b>Meal 2</b>     |                                        |              |                        |
| Chicken           | 223.5 g                                | (155 – 332)  | 163 kcal               |
| BBQ Sauce         | 163.2 g                                | (96 – 267)   | 81 kcal                |
| Green Beans       | 251.8 g                                | (161 – 371)  | 59 kcal                |
| Mashed Potatoes   | 342.7 g                                | (246 – 472)  | 141 kcal               |
| Butter            | 22.8 g                                 | (12 – 48)    | 717 kcal               |
| Cookies           | 79.3 g                                 | (46 – 124)   | 470 kcal               |
| <b>Meal 3</b>     |                                        |              |                        |
| Pork Loin         | 236.2 g                                | (156 – 357)  | 207 kcal               |
| Apple cider glaze | 136.8 g                                | (74 – 249)   | 106 kcal               |
| Roasted Carrots   | 275.7 g                                | (160 – 332)  | 144 kcal               |
| Orzo              | 244.0 g                                | (160 – 400)  | 256 kcal               |
| Butter            | 23.4 g                                 | (13 – 41)    | 717 kcal               |
| Rice Pudding      | 246.4 g                                | (154 – 389)  | 196 kcal               |

**Table S2.** Associations (Pearson correlations and regression models) between true and participant-estimated total energy and food portion sizes (mean centered), comparing MealScanner 3-D (MS3D) to Written Food Record (WFR) arms<sup>a</sup>

|                                  | Pearson Correlations <sup>b</sup> |      |                        | Regression Models <sup>c</sup> |             |  |             |             |                                     |
|----------------------------------|-----------------------------------|------|------------------------|--------------------------------|-------------|--|-------------|-------------|-------------------------------------|
|                                  |                                   |      |                        | Intercept <sup>d</sup> ± se    |             |  | Slope ± se  |             |                                     |
|                                  | MS3D                              | WFR  | p-value for difference | MS3D                           | WFR         |  | MS3D        | WFR         | p-value for difference <sup>f</sup> |
| Total Energy <sup>e</sup> (kcal) | 0.81                              | 0.77 | 0.46                   | 2843 ± 60                      | 2869 ± 57   |  | 0.72 ± 0.06 | 0.74 ± 0.06 | 0.81                                |
| <b>Meal 1</b>                    |                                   |      |                        |                                |             |  |             |             |                                     |
| Lasagna (g)                      | 0.71                              | 0.45 | 0.01                   | 222.3 ± 8.4                    | 242.1 ± 8.1 |  | 0.44 ± 0.06 | 0.28 ± 0.05 | 0.04                                |
| Broccoli (g)                     | 0.73                              | 0.68 | 0.50                   | 102.4 ± 3.5                    | 65.8 ± 2.8  |  | 0.68 ± 0.07 | 0.25 ± 0.03 | <0.0001                             |
| Garlic Bread (g)                 | 0.74                              | 0.44 | 0.002                  | 80.6 ± 3.2                     | 77.5 ± 3.1  |  | 0.90 ± 0.10 | 0.42 ± 0.08 | 0.0003                              |
| <b>Meal 2</b>                    |                                   |      |                        |                                |             |  |             |             |                                     |
| Chicken (g)                      | 0.73                              | 0.64 | 0.27                   | 137.3 ± 5.0                    | 144.6 ± 4.8 |  | 0.55 ± 0.06 | 0.57 ± 0.07 | 0.88                                |
| BBQ Sauce (g)                    | 0.42                              | 0.69 | 0.01                   | 40.1 ± 3.0                     | 50.4 ± 3.0  |  | 0.14 ± 0.03 | 0.40 ± 0.05 | <0.0001                             |
| Green Beans (g)                  | 0.79                              | 0.82 | 0.66                   | 111.8 ± 4.4                    | 118.1 ± 4.3 |  | 0.51 ± 0.04 | 0.56 ± 0.04 | 0.43                                |
| Mashed Potatoes (g)              | 0.81                              | 0.80 | 0.94                   | 174.7 ± 5.2                    | 167.0 ± 5.2 |  | 0.49 ± 0.04 | 0.40 ± 0.03 | 0.10                                |
| Butter (g)                       | 0.71                              | 0.64 | 0.49                   | 7.6 ± 0.6                      | 9.8 ± 0.6   |  | 0.31 ± 0.05 | 0.39 ± 0.05 | 0.27                                |
| Cookies (g)                      | 0.42                              | 0.30 | 0.42                   | 88.9 ± 6.3                     | 68.4 ± 2.8  |  | 0.52 ± 0.15 | 0.17 ± 0.06 | 0.03                                |
| <b>Meal 3</b>                    |                                   |      |                        |                                |             |  |             |             |                                     |
| Pork Loin (g)                    | 0.77                              | 0.70 | 0.29                   | 137.4 ± 4.9                    | 143.4 ± 4.7 |  | 0.63 ± 0.06 | 0.60 ± 0.06 | 0.73                                |
| Apple cider glaze (g)            | 0.39                              | 0.64 | 0.03                   | 35.9 ± 2.7                     | 35.3 ± 2.5  |  | 0.24 ± 0.06 | 0.45 ± 0.07 | 0.016                               |
| Roasted Carrots (g)              | 0.85                              | 0.76 | 0.11                   | 120.1 ± 5.0                    | 141.5 ± 4.7 |  | 0.67 ± 0.05 | 0.56 ± 0.05 | 0.11                                |
| Orzo (g)                         | 0.79                              | 0.76 | 0.59                   | 114.0 ± 4.5                    | 125.7 ± 4.4 |  | 0.56 ± 0.05 | 0.55 ± 0.05 | 0.95                                |
| Butter (g)                       | 0.77                              | 0.51 | 0.06                   | 8.5 ± 0.8                      | 8.7 ± 0.9   |  | 0.46 ± 0.07 | 0.38 ± 0.10 | 0.55                                |
| Rice Pudding (g)                 | 0.74                              | 0.92 | 0.0002                 | 117.8 ± 5.8                    | 113.1 ± 5.1 |  | 0.53 ± 0.05 | 0.46 ± 0.03 | 0.21                                |

<sup>a</sup>Sample sizes in each cell are given in Table 2. <sup>b</sup>All correlations p<0.01. <sup>c</sup>Intercepts and regression coefficients from model: True = Arm (coded 0 or 1) + mean centered Participant-Reported Value + (Arm \* mean centered Participant-Reported Value). <sup>d</sup>Total energy and individual food portions sizes centered on the general mean value as follows: Total Energy: 2721 kcal; Lasagna: 295.5 g; Broccoli: 124.9 g; Garlic Bread: 60.3 g; Chicken: 164.1; BBQ sauce: 54.7g; Green Beans: 146.8g; Potatoes: 227.3g; Butter (Meal 2): 15.5; Cookies: 66.1g; Pork: 161.5g; Apple cider glaze: 38.7g; Carrots: 150g; Orzo: 142.4g; Butter (Meal 3): 14.1g; Pudding: 152.1g. <sup>e</sup> Total energy for all meals combined. <sup>f</sup> p-value testing for differences in slopes between the MS3D and WFR arms.
